# Supplementary material
Source: PubMed Central journal article supplement (PMC7212527)
Supplement: NIHMS1583851-supplement-Supplementary_Material.pdf [file NIHMS1583851-supplement-Supplementary_Material.pdf]

# Immunotherapeutic approaches for small-cell lung cancer

---

*Wade T. Iams, Jason Porter and Leora Horn*

<https://doi.org/10.1038/s41571-019-0316-z>

**Supplementary Table 1. Ongoing clinical trial of immunotherapies in patients with SCLC**

|                                                 | Disease Stage                | Biomarker Selection      | Phase  | Randomized or single arm | Treatment                                                                                                                          |
|-------------------------------------------------|------------------------------|--------------------------|--------|--------------------------|------------------------------------------------------------------------------------------------------------------------------------|
| <i>Upfront</i>                                  |                              |                          |        |                          |                                                                                                                                    |
| NCT02402920                                     | LS-SCLC and ES-SCLC          | None                     | I      | Single arm               | CCR* + pembrolizumab w/maintenance                                                                                                 |
| NRG-LU005 (NCT03811002)                         | LS-SCLC                      | None                     | II/III | Randomized               | CCR vs CCR + atezolizumab w/maintenance                                                                                            |
| EA5161 (NCT03382561)                            | ES-SCLC                      | None                     | II     | Randomized               | EP** vs EP + nivolumab w/maintenance                                                                                               |
| REACTION (NCT02580994)                          | ES-SCLC                      | None                     | II     | Randomized               | EP vs EP + pembrolizumab w/maintenance                                                                                             |
| KEYNOTE-604 (NCT03066778)                       | ES-SCLC                      | None                     | III    | Randomized               | EP vs EP + pembrolizumab w/maintenance                                                                                             |
| NCT02658214                                     | ES-SCLC                      | None                     | Ib     | Single arm               | EP + durvalumab + tremelimumab                                                                                                     |
| CASPIAN (NCT03043872)                           | ES-SCLC                      | None                     | III    | Randomized               | EP vs EP + durvalumab w/maintenance vs EP + tremelimumab + durvalumab w/durvalumab maintenance                                     |
| <i>First-line maintenance</i>                   |                              |                          |        |                          |                                                                                                                                    |
| STIMULI (NCT02046733)                           | LS-SCLC                      | None                     | III    | Randomized               | Nivolumab + ipilimumab w/nivolumab maintenance vs placebo                                                                          |
| ( ADRIATIC (NCT03703297)                        | LS-SCLC                      | None                     | III    | Randomized               | Durvalumab + tremelimumab w/durvalumab maintenance vs durvalumab maintenance vs placebo                                            |
| <i>Second-line or later monotherapies</i>       |                              |                          |        |                          |                                                                                                                                    |
| AFT17 (NCT02963090)                             | Relapsed LS-SCLC and ES-SCLC | None                     | II     | Randomized               | Pembrolizumab vs topotecan                                                                                                         |
| <i>Second-line or later combination therapy</i> |                              |                          |        |                          |                                                                                                                                    |
| NCT02701400                                     | Relapsed LS-SCLC and ES-SCLC | None                     | II     | Randomized               | Durvalumab + tremelimumab vs durvalumab + tremelimumab + SBRT                                                                      |
| NCT03179436                                     | Relapsed LS-SCLC and ES-SCLC | None                     | I      | Multi-arm                | Pembrolizumab + anti-CTLA-4 (MK-1308)                                                                                              |
| <i>Combinations with novel agents</i>           |                              |                          |        |                          |                                                                                                                                    |
| NCT02937818                                     | ES-SCLC                      | None                     | II     | Multi-arm                | Durvalumab + tremelimumab w/durvalumab maintenance vs carboplatin + WEE1 inhibitor (AZD1775) vs olaparib + ATR inhibitor (AZD6738) |
| KEYNOTE-603 (NCT03313778)                       | Relapsed LS-SCLC and ES-SCLC | None                     | I      | Multi-arm                | Pembrolizumab + tumour-based mRNA neoantigen vaccine (mRNA-4157)                                                                   |
| NCT02734004                                     | Relapsed LS-SCLC and ES-SCLC | Platinum sensitive       | I/II   | Multi-arm                | Durvalumab + PARP inhibitor (olaparib)                                                                                             |
| -SUKSES (NCT02688894)                           | Relapsed LS-SCLC and ES-     | AKT1 mutation – AZD5363; | I      | Multi-arm                | Durvalumab + AKT inhibitor (AZD5363) or PARP inhibitor (olaparib) or WEE1 inhibitor                                                |

|                                           |                                        |                                                                                                                                                       |    |            |                                                              |
|-------------------------------------------|----------------------------------------|-------------------------------------------------------------------------------------------------------------------------------------------------------|----|------------|--------------------------------------------------------------|
|                                           | SCLC                                   | <i>BRCA1/2</i> ,<br><i>ATM</i> ,<br><i>MRE11A</i> –<br>olaparib;<br><i>MYC</i> ,<br><i>CDKN2A</i> ,<br><i>TP53</i> –<br>AZD1775;<br>none –<br>AZD6738 |    |            | (AZD1775) or ATR inhibitor<br>(AZD6738)                      |
| <i>CAR T cells</i>                        |                                        |                                                                                                                                                       |    |            |                                                              |
| NCT03392064                               | Relapsed<br>LS-SCLC<br>and ES-<br>SCLC | None                                                                                                                                                  | I  | Single arm | DLL3 CAR-T (AMG 119)                                         |
| <i>BiTE</i>                               |                                        |                                                                                                                                                       |    |            |                                                              |
| NCT03319940                               | Relapsed<br>LS-SCLC<br>and ES-<br>SCLC | None                                                                                                                                                  | I  | Single-arm | Anti-CD3 + anti-DLL3 BiTE<br>(AMG757)                        |
| <i>Novel Immune-checkpoint Inhibitors</i> |                                        |                                                                                                                                                       |    |            |                                                              |
| NCT03708328                               | Relapsed<br>LS-SCLC<br>and ES-<br>SCLC | None                                                                                                                                                  | I  | Single-arm | Anti-TIM3 and PD-1 bispecific<br>antibody (RO7121661)        |
| NCT03365791                               | Relapsed<br>LS-SCLC<br>and ES-<br>SCLC | None                                                                                                                                                  | II | Single-arm | Anti-LAG3 antibody (LAG525) +<br>anti-PD-1 antibody (PDR001) |

BiTE, Bi-specific T cell engager; CCR, concurrent chemoradiation; CAR, chimeric antigen receptor CTLA-4, cytotoxic T-lymphocyte protein 4; EP, platinum plus etoposide; ES-SCLC, extensive-stage small-cell lung cancer; LAG3, lymphocyte activation gene 3 protein; LS-SCLC, limited-stage small-cell lung cancer; PARP, poly [ADP-ribose] polymerase; PD-1, programmed cell death protein 1; SBRT, stereotactic body radiation therapy.
